# Supplementary material for: Graphene-oxide loading on natural zeolite particles for enhancement of adsorption properties
Source: Royal Society of Chemistry journal article supplement (doi:10.1039/c9ra00572b), 2020-01-01
Supplement: c9ra00572b1.pdf [file c9ra00572b1.pdf]

## Graphene-oxide loading on natural zeolite particles for enhancement of adsorption properties

M. R. Silva\*<sup>a</sup>, R. Lecus<sup>a</sup>, M. Gajdardziska<sup>b</sup>, M. Schofield<sup>b</sup>, M. Virnoche<sup>a</sup>, J. Chang<sup>a,c</sup>, J. Chen<sup>a,c</sup> and D. Garman<sup>a</sup>

Electronic supplementary information (ESI).

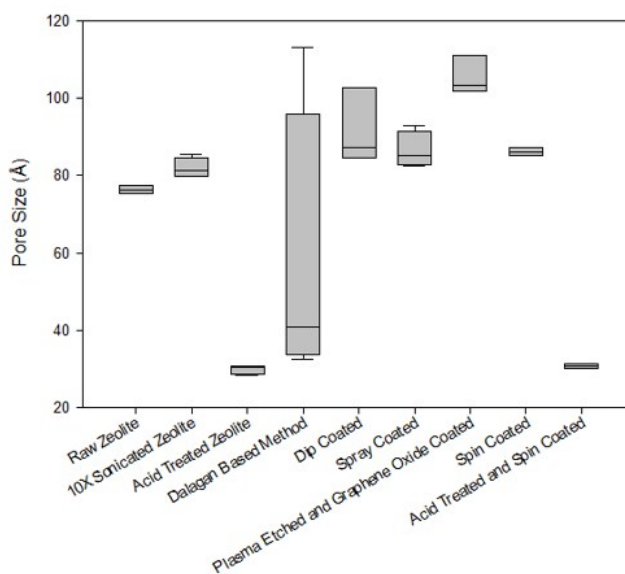

**Figure ESI-1.** Pore size of zeolite particles under different cleaning and coating treatments.

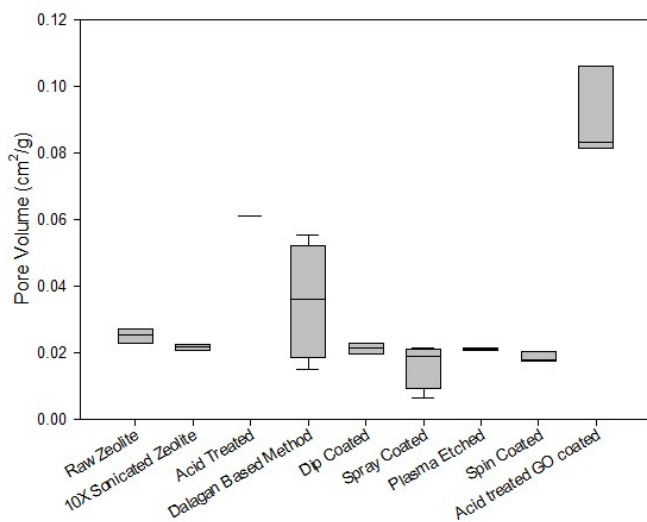

**Figure ESI-2.** Pore volume of zeolite particles under different cleaning and coating treatments.

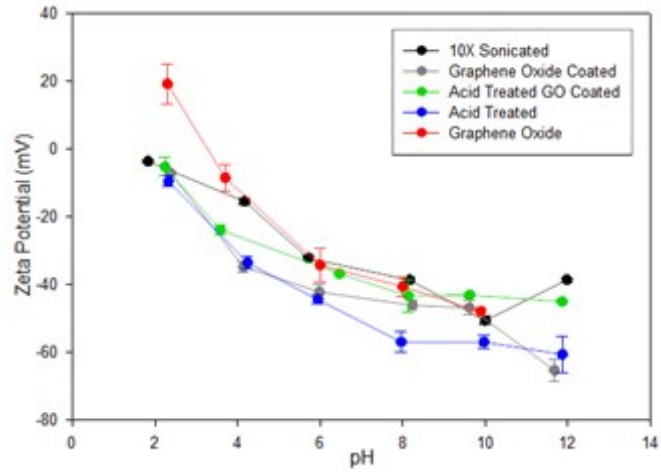

**Figure ESI-3.** Effect of solution pH on the zeta potential of zeolite particles and GO suspensions.

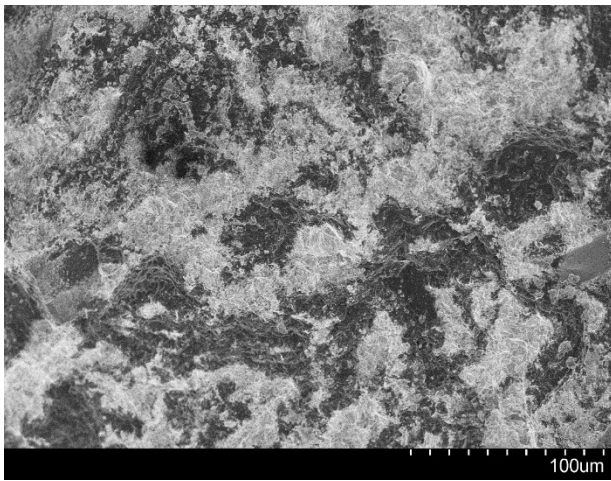

**Figure ESI-4.** SEM image of dip coated zeolite exemplifying observation of islands of GO deposits (darker spots), that can also be seen by unaided eye.

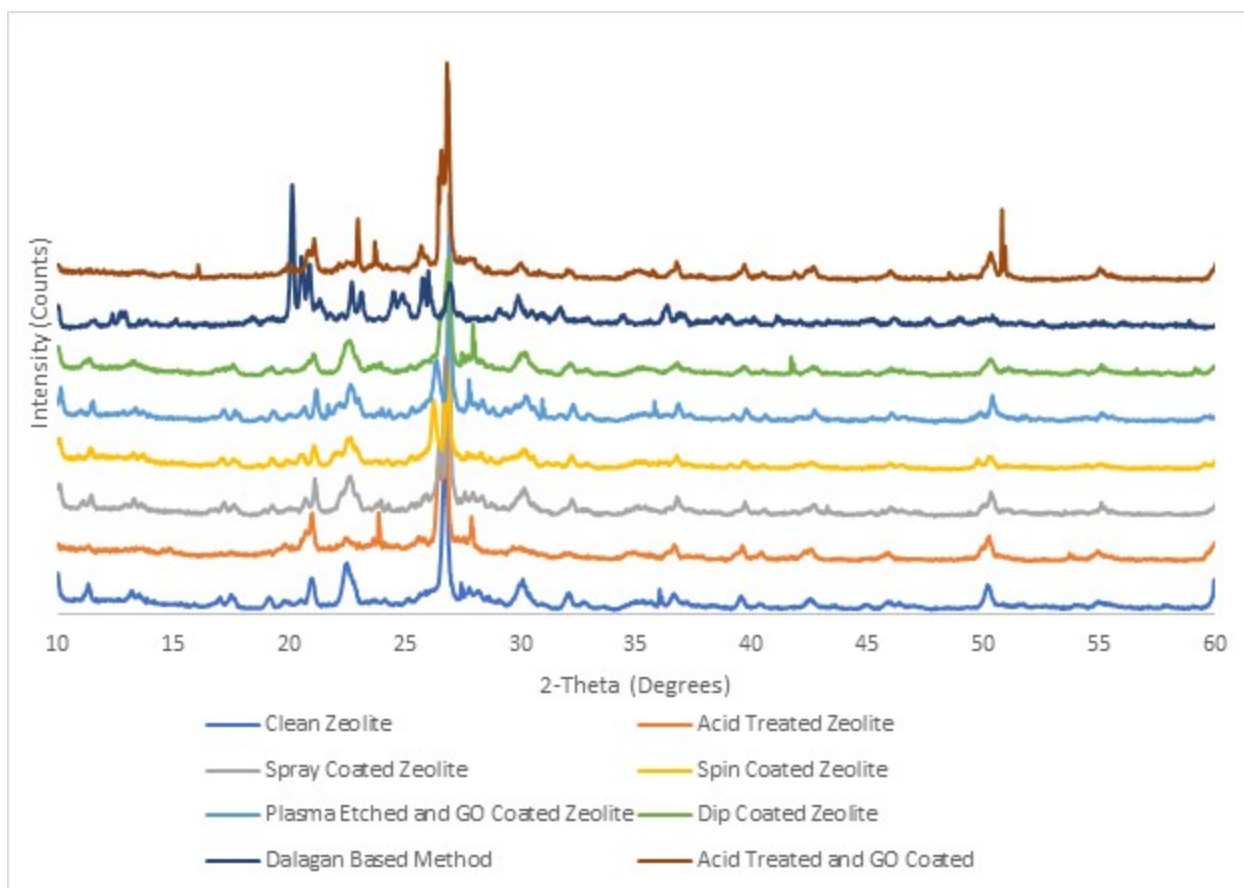

**Figure ESI-5.** XRD patterns of zeolites- clean, acid treated and coated with GO using different methods.

**Table 1.** Metal sorption and desorption percent by zeolite

| Zeolites                     | Cd uptake | Adsorption | Desorption |
|------------------------------|-----------|------------|------------|
|                              | mg/g      | % RE       | % DE       |
| Acid treated and spin coated | 695       | 75         | 19         |
| Clean zeolite                | 708       | 77         | 89         |
| Spin coated                  | 718       | 78         | 99         |
| Dalagan based method         | 656       | 71         | 0          |
| Dip coated                   | 720       | 78         | 95         |
| Acid treated zeolite         | 661       | 72         | 14         |
| Plasma etched and GO coated  | 709       | 77         | 96         |
| Spray coated                 | 714       | 77         | 94         |

Table 2. Economic Analysis for Engineered zeolites applied in water treatment

| Price of GO<br>(\$/g)                    | Price of AC<br>(\$/kg) | Price of natural zeolite<br>(\$/kg) | GO Theoretical loading<br>(mg/g) | Our material prices<br>(not including synthesis process)<br>(\$/kg) |          |                        |
|------------------------------------------|------------------------|-------------------------------------|----------------------------------|---------------------------------------------------------------------|----------|------------------------|
|                                          |                        |                                     |                                  | Lowest<br>(Industry scale)                                          | Medium   | Highest<br>(lab scale) |
| Lowest price (China Shandong)<br>0.3~0.5 | 5~15                   | 0.2~1                               | 2.5                              | 0.95~1.13                                                           | 3.5~63.5 | 125~375                |
| Medium price (China Jiang Su)<br>1~25    |                        |                                     |                                  |                                                                     |          |                        |
| Supply made in the U.S.<br>50~150        |                        |                                     |                                  |                                                                     |          |                        |

\*The GO theoretical loading is the amount of GO added in the coating process, which should be higher than practice. Also, the GO can be recycled in the industry process.

\* All the final prices are including the production cost.

The calculation for the cost our materials:

Take Medium price of GO in the market for example: \$1/g

For the theoretical loading is 2.5, price of GO zeolite =  $1 \times 2.5 + 0.5 = \$3/\text{kg}$

The costs of expenses are around \$0.5~1/kg to produce the materials, so the final price is ~\$4/kg
